# Supplementary material for: Distinct Single Cell Gene Expression in Peripheral Blood Monocytes Correlates With Tumor Necrosis Factor Inhibitor Treatment Response Groups Defined by Type I Interferon in Rheumatoid Arthritis
Source: PubMed Central journal article supplement (PMC7378891; doi:10.3389/fimmu.2020.01384), 2020-07-16

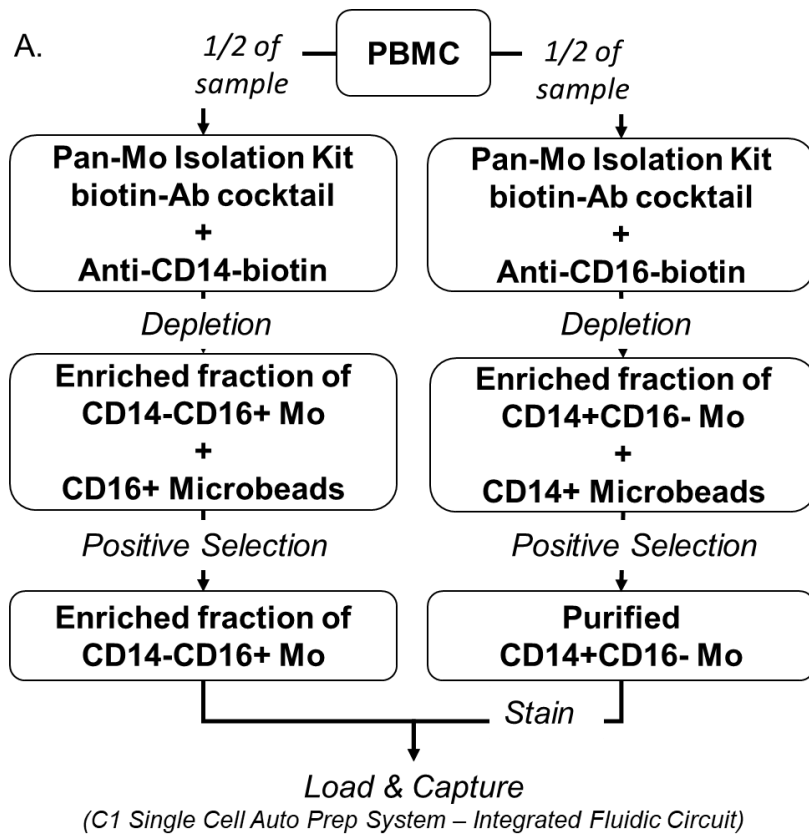

**Supplemental Figure 1. Workflow for purification of classical (CD14<sup>++</sup>CD16<sup>-</sup>) and non-classical (CD14<sup>dim</sup>CD16<sup>+</sup>) monocytes.**

(A). Classical (CL) and non-classical (NC) monocytes (Mo) were isolated from peripheral blood. CL (CD14<sup>++</sup>CD16<sup>-</sup>) Mo were purified using the Human Pan-Monocyte Isolation Kit (Miltenyi) with modification of adding anti-CD16-biotin (Miltenyi) into the biotin-antibody cocktail. CD14<sup>+</sup> selection (Miltenyi) was used subsequently to further increase purity. Purified CL Mo were stained with Molecular Probes CellTracker Green CMFDA Dye (Life Technologies). NC (CD14<sup>dim</sup>CD16<sup>+</sup>) Mo were purified similarly, using CD16 microbeads (Miltenyi) during positive selection. (B). Purity checked by flow cytometry was very high (> 95%) for both CL and NC Mo.

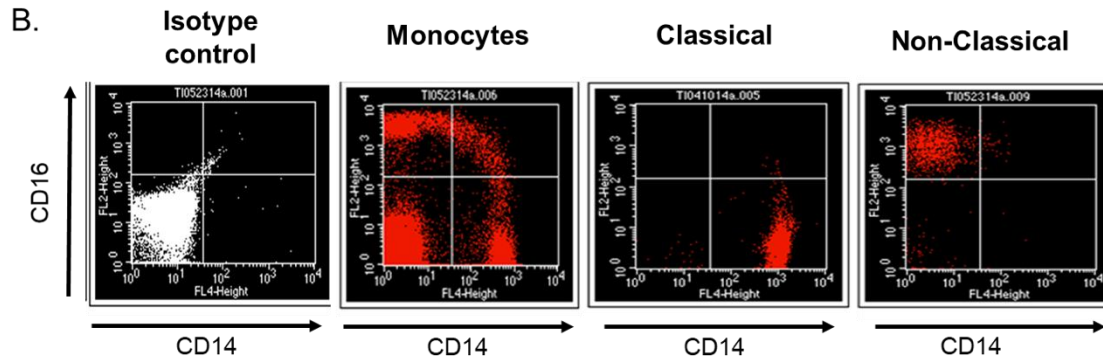

Supplement: Image_1.pdf [file Image_1.pdf]
