# Supplementary material for: Distinct Single Cell Gene Expression in Peripheral Blood Monocytes Correlates With Tumor Necrosis Factor Inhibitor Treatment Response Groups Defined by Type I Interferon in Rheumatoid Arthritis
Source: PubMed Central journal article supplement (PMC7378891; doi:10.3389/fimmu.2020.01384), 2020-07-16
Supplement: Image_4.pdf [file Image_4.pdf]

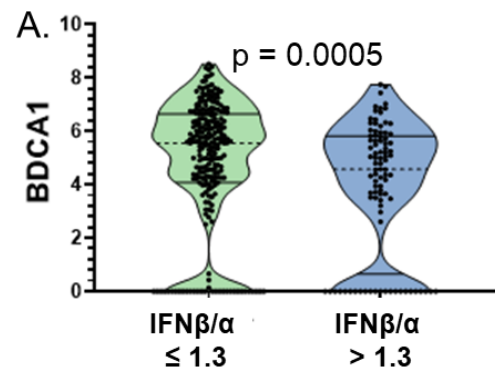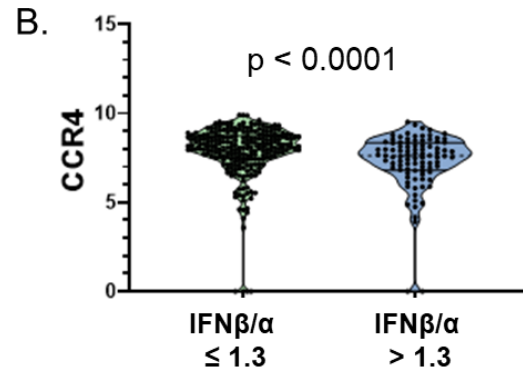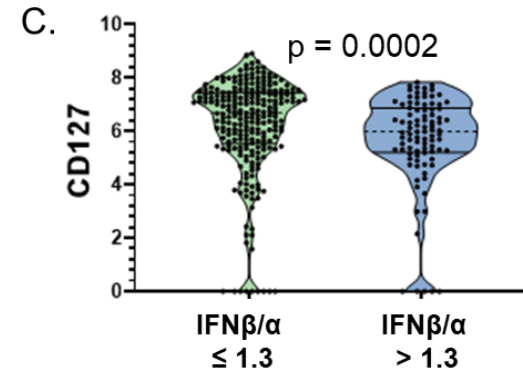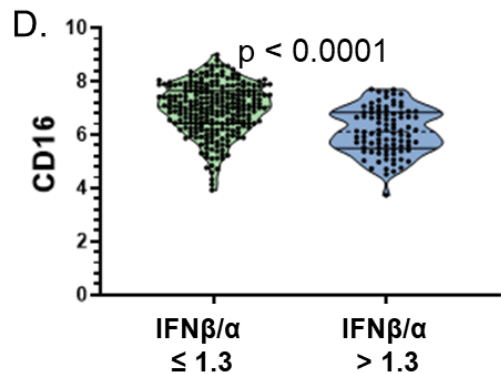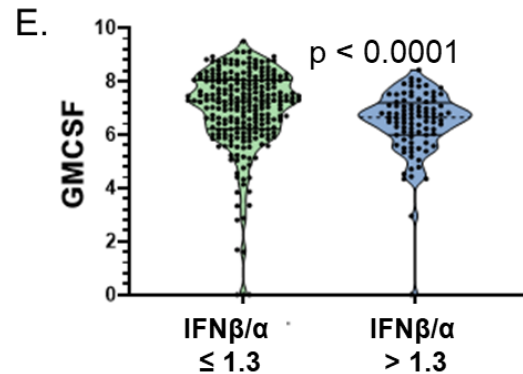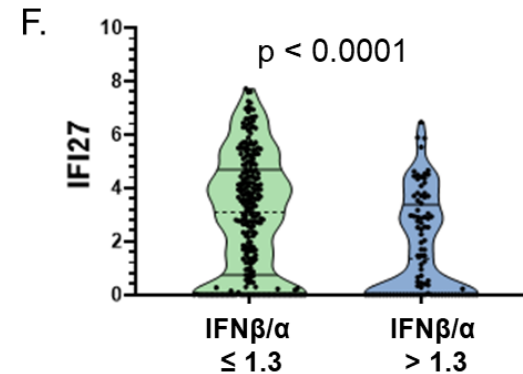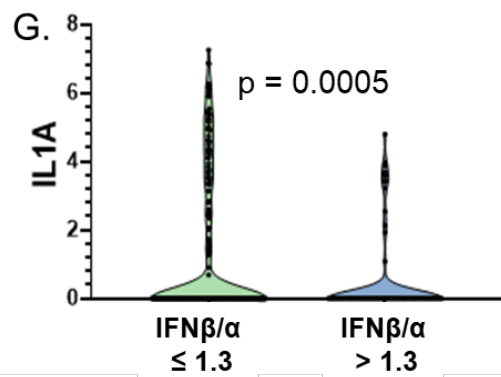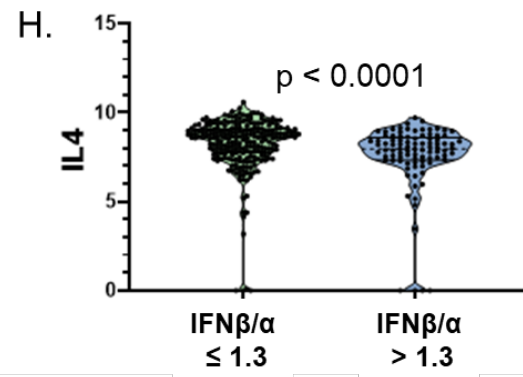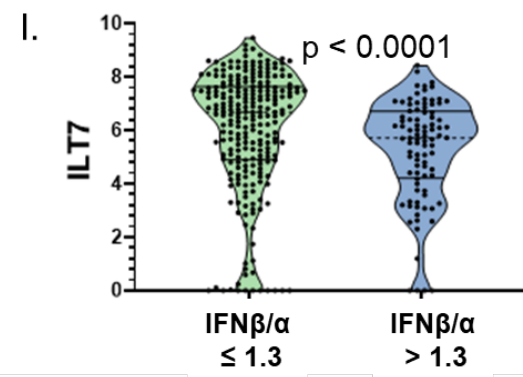

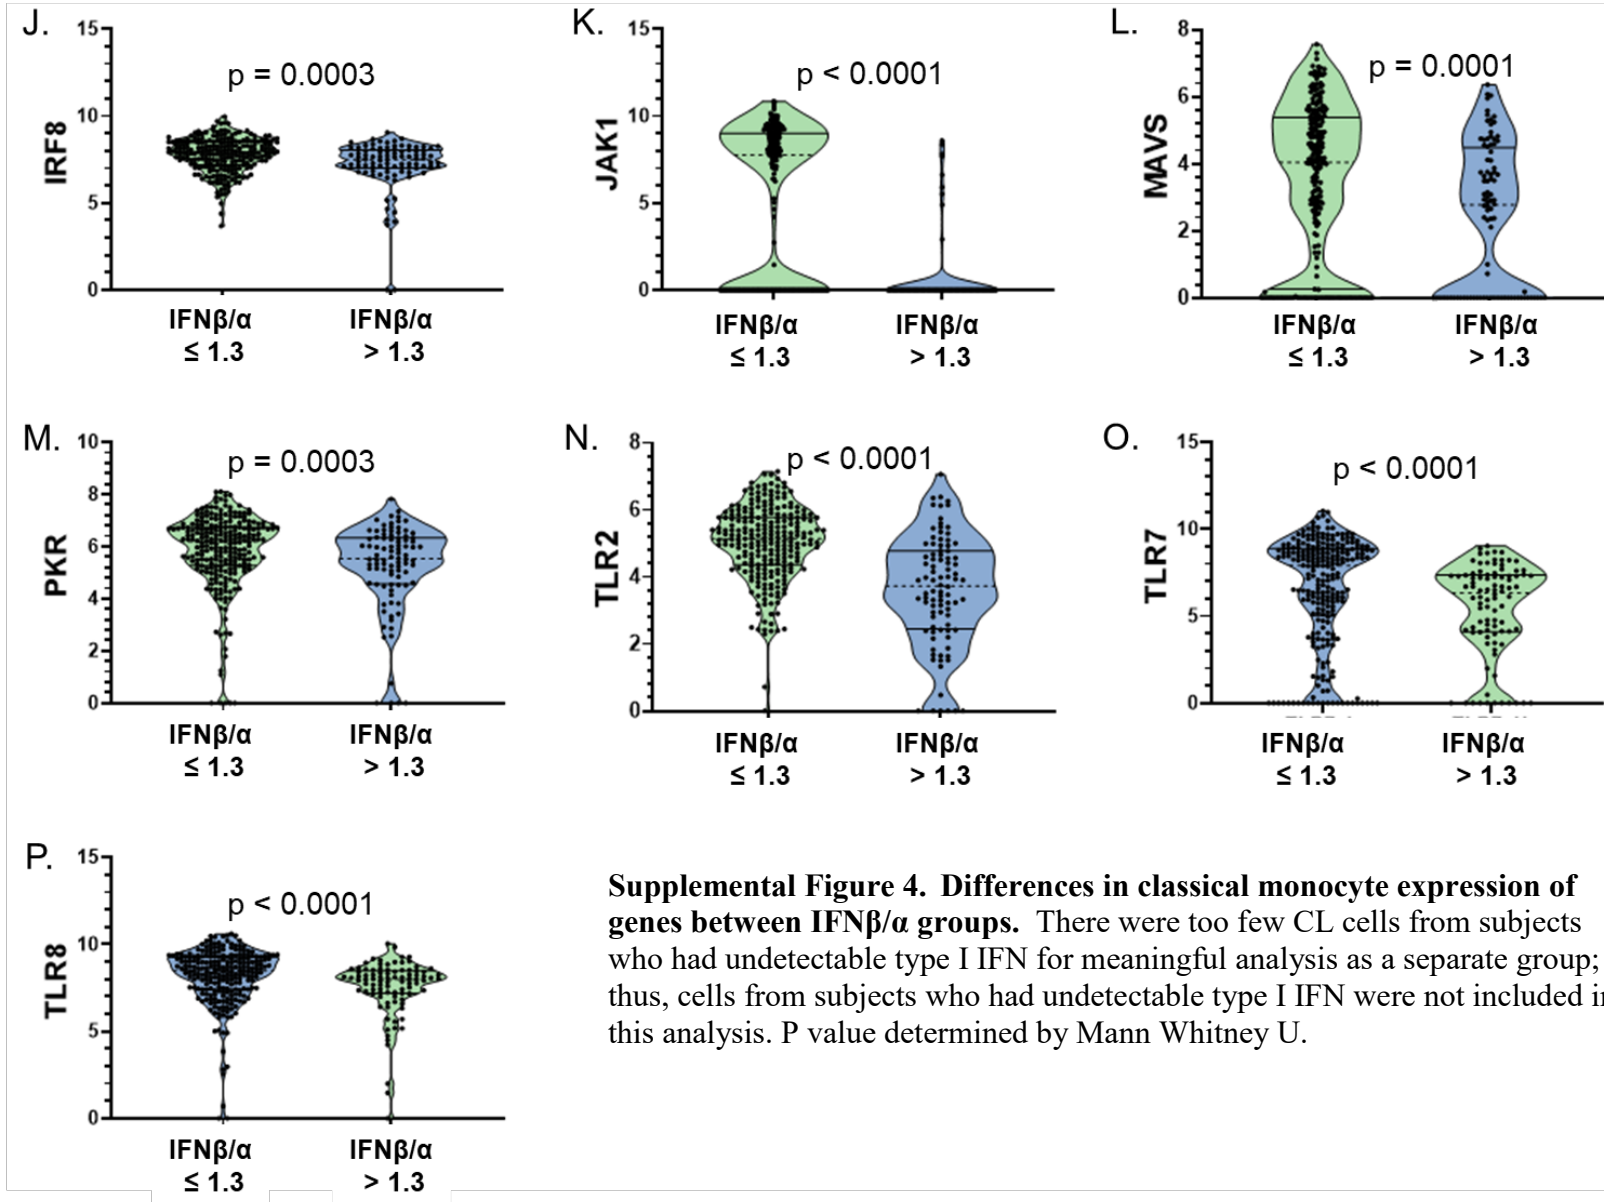

**Supplemental Figure 4. Differences in classical monocyte expression of genes between IFN $\beta/\alpha$  groups.** There were too few CL cells from subjects who had undetectable type I IFN for meaningful analysis as a separate group; thus, cells from subjects who had undetectable type I IFN were not included in this analysis. P value determined by Mann Whitney U.
