# Supplementary material for: Distinct Single Cell Gene Expression in Peripheral Blood Monocytes Correlates With Tumor Necrosis Factor Inhibitor Treatment Response Groups Defined by Type I Interferon in Rheumatoid Arthritis
Source: PubMed Central journal article supplement (PMC7378891; doi:10.3389/fimmu.2020.01384), 2020-07-16
Supplement: Image_5.pdf [file Image_5.pdf]

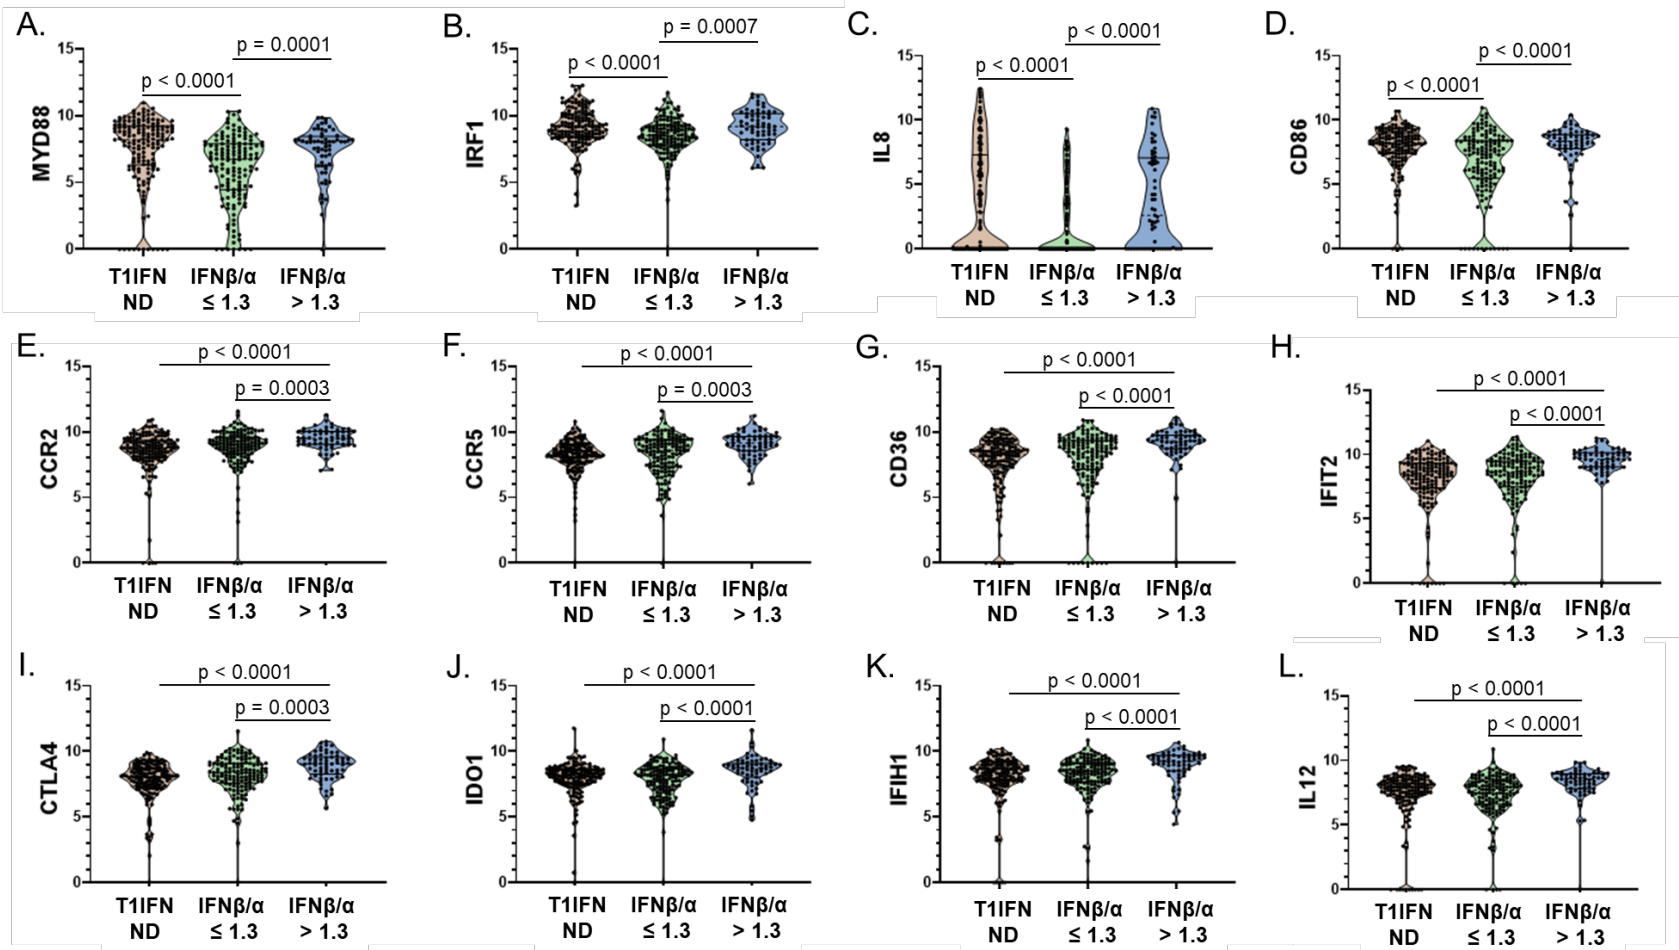

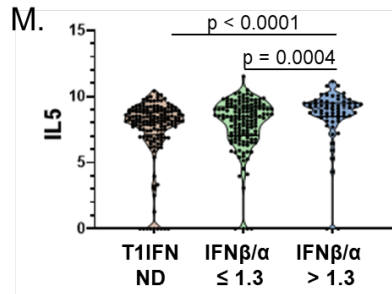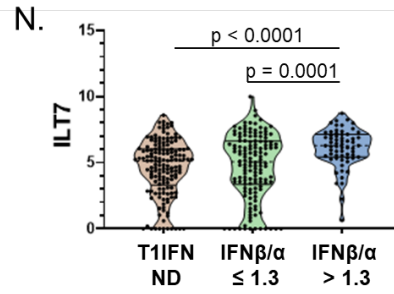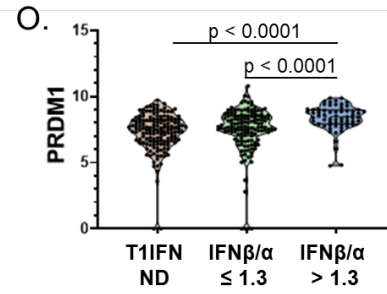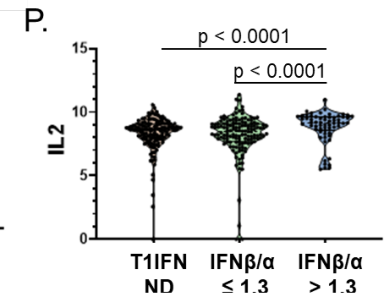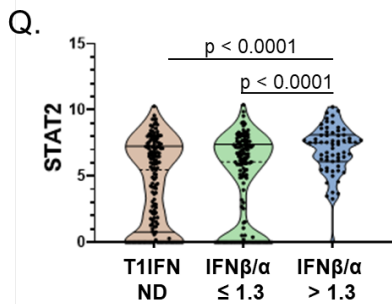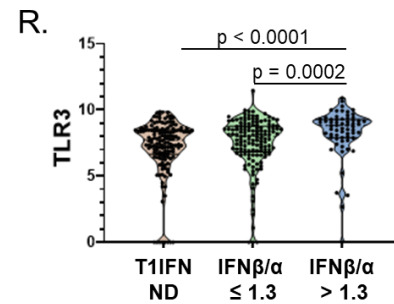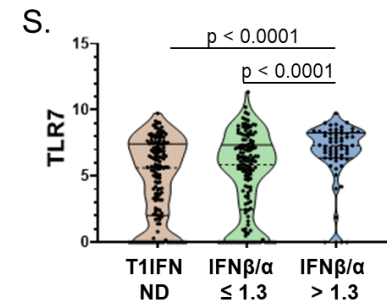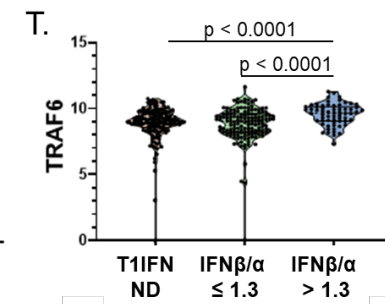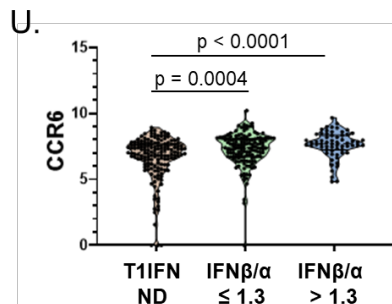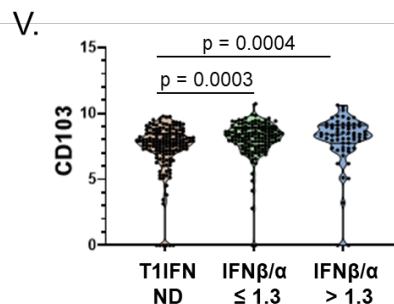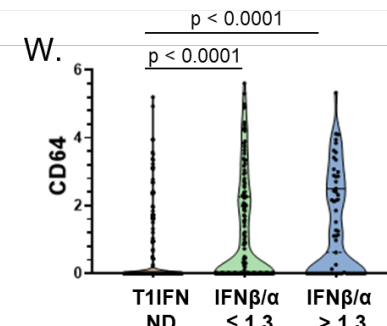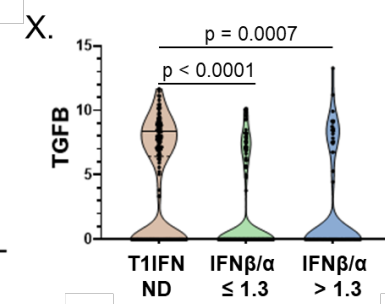

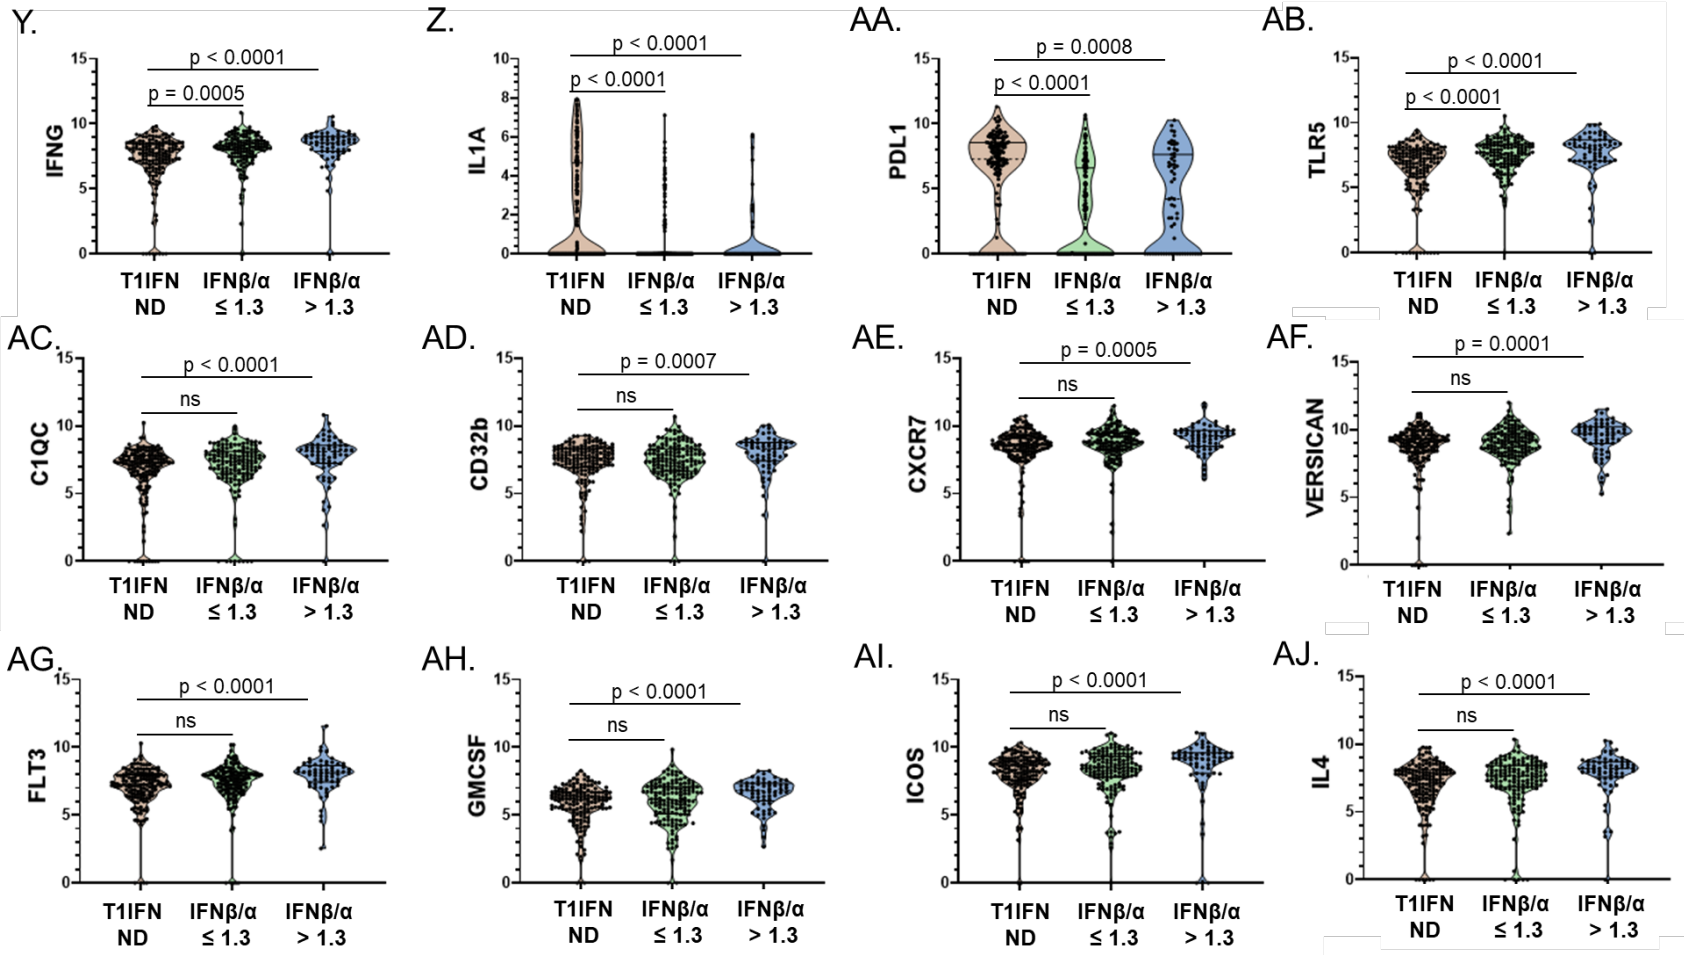

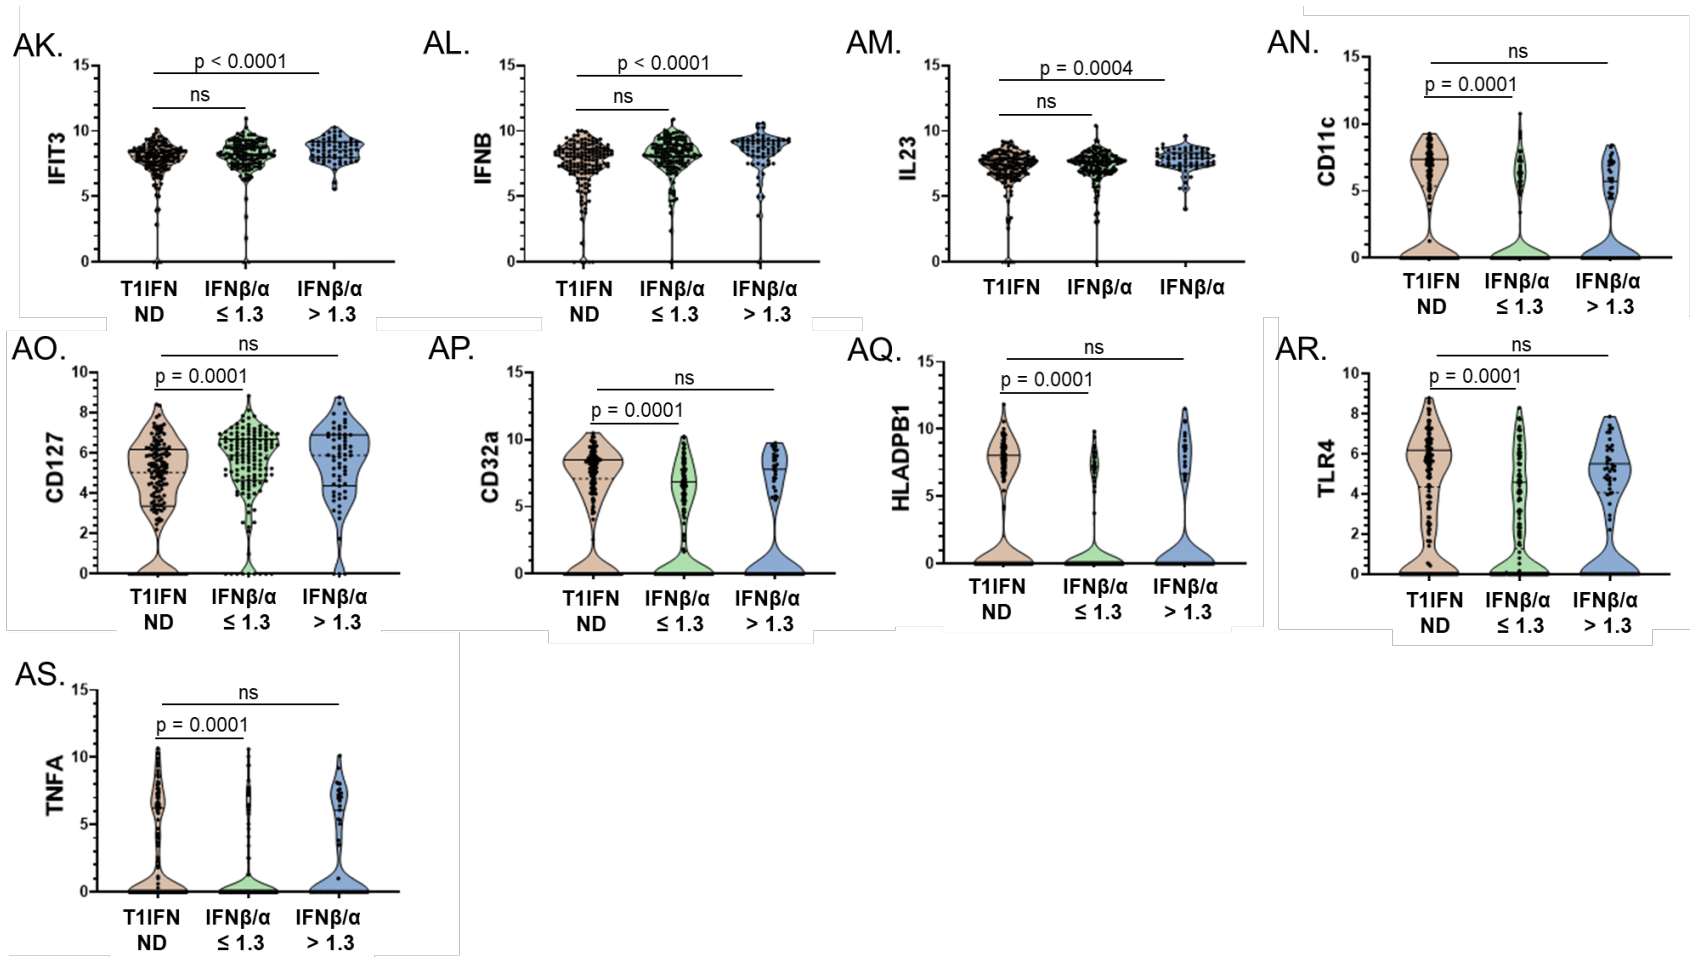

**Supplemental Figure 5. Differences in single non-classical monocyte expression of genes between Type I IFN activity groups.** P value determined by Mann Whitney U. For (U – AS), difference between IFNβ/α > 1.3 and IFNβ/α ≤ 1.3 was not detected (p ≥ 0.0008).
