# Supplementary material for: Distinct Single Cell Gene Expression in Peripheral Blood Monocytes Correlates With Tumor Necrosis Factor Inhibitor Treatment Response Groups Defined by Type I Interferon in Rheumatoid Arthritis
Source: PubMed Central journal article supplement (PMC7378891; doi:10.3389/fimmu.2020.01384), 2020-07-16
Supplement: Image_6.pdf [file Image_6.pdf]

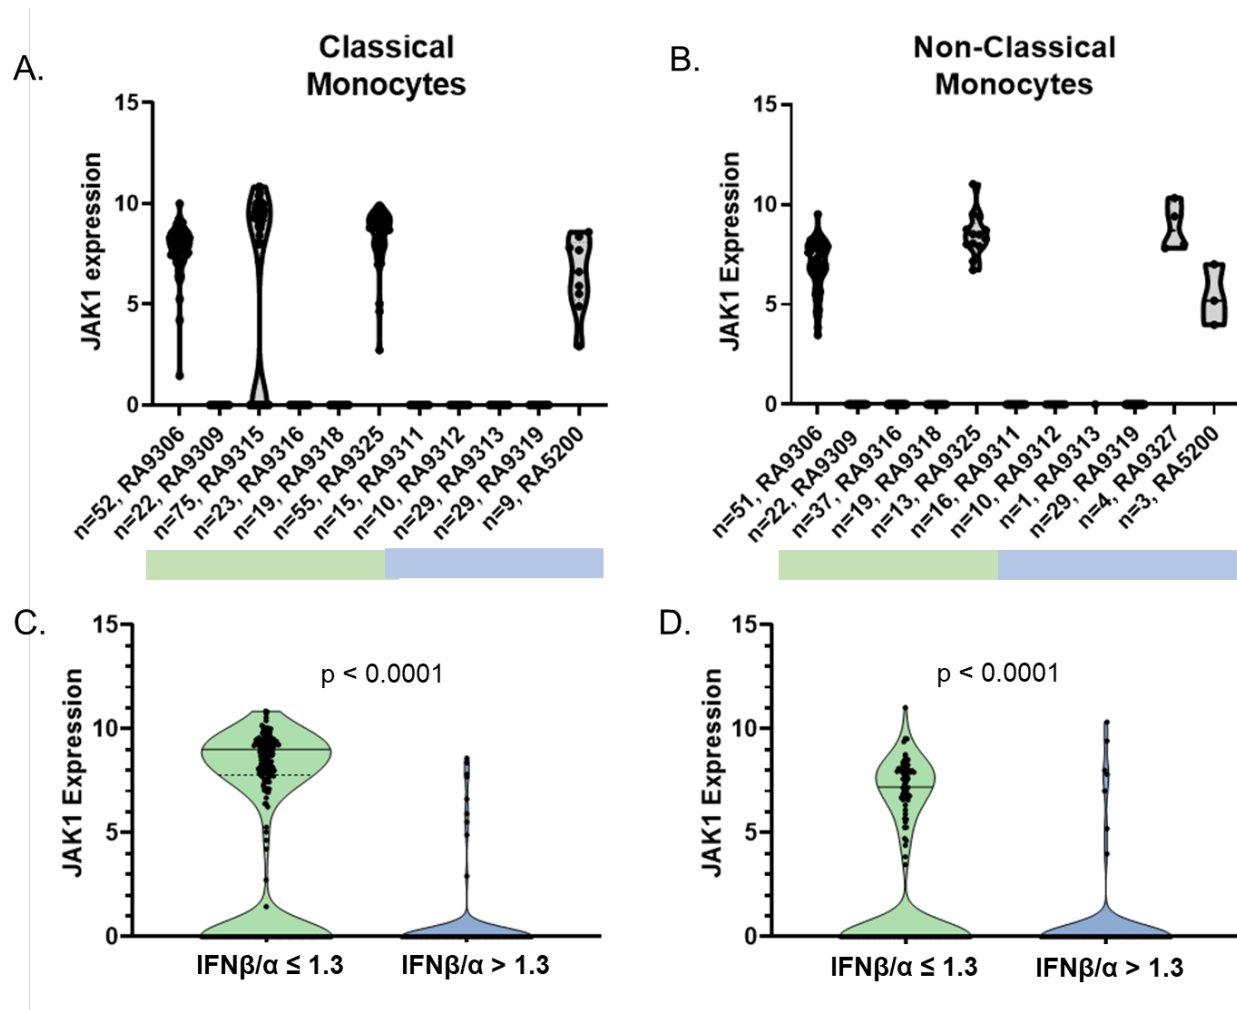

**Supplemental Figure 6. Expression of JAK1 in single classical and non-classical monocytes from RA patients who had detectable type I IFN activity.** P-value by non-parametric Mann Whitney U. Top panels show each individual patient's cells in a separate column, bottom panels show cells from all patients in aggregate.
