# Supplementary material for: Distinct Single Cell Gene Expression in Peripheral Blood Monocytes Correlates With Tumor Necrosis Factor Inhibitor Treatment Response Groups Defined by Type I Interferon in Rheumatoid Arthritis
Source: PubMed Central journal article supplement (PMC7378891; doi:10.3389/fimmu.2020.01384), 2020-07-16
Supplement: Image_7.pdf [file Image_7.pdf]

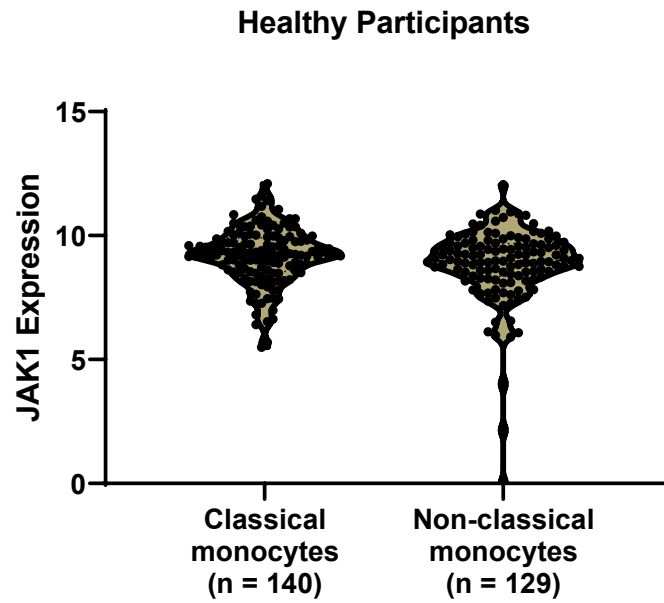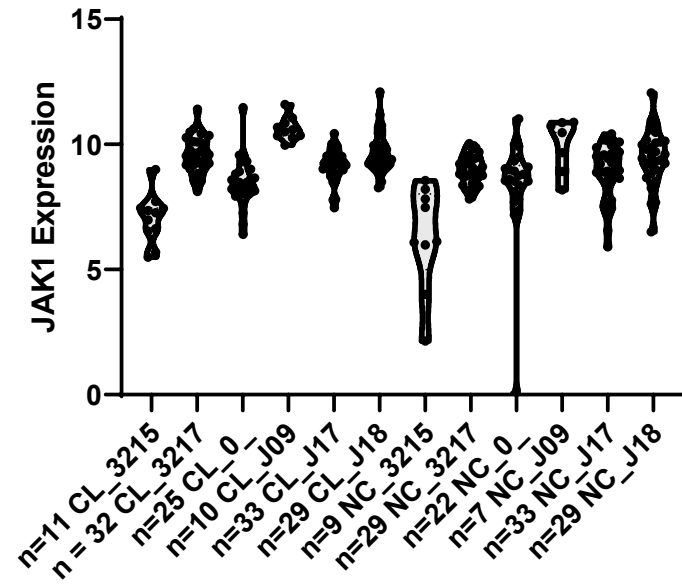

**Supplemental Figure 7. Expression of JAK1 in single classical and non-classical monocytes from healthy controls.** Left panel shows cells from healthy control in aggregate. The right panel shows each individual healthy participant's cells in a separate column.
