# Supplementary material for: Distinct Single Cell Gene Expression in Peripheral Blood Monocytes Correlates With Tumor Necrosis Factor Inhibitor Treatment Response Groups Defined by Type I Interferon in Rheumatoid Arthritis
Source: PubMed Central journal article supplement (PMC7378891; doi:10.3389/fimmu.2020.01384), 2020-07-16
Supplement: Image_8.pdf [file Image_8.pdf]

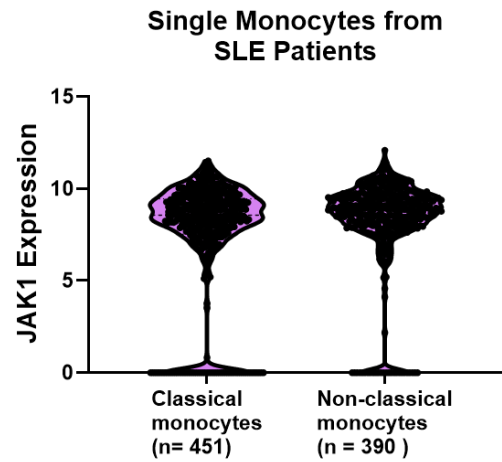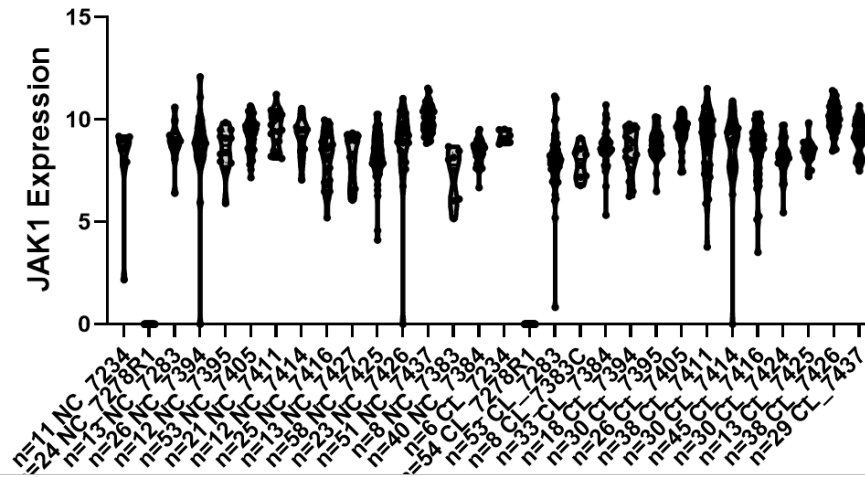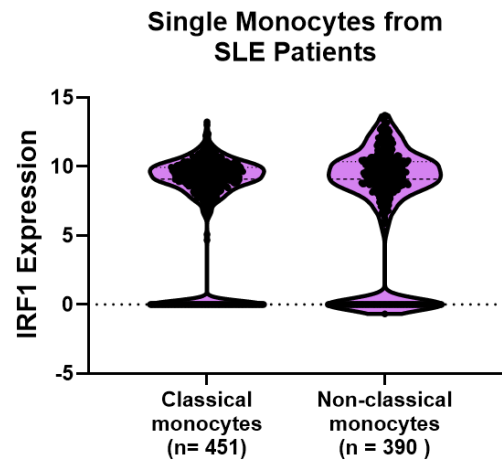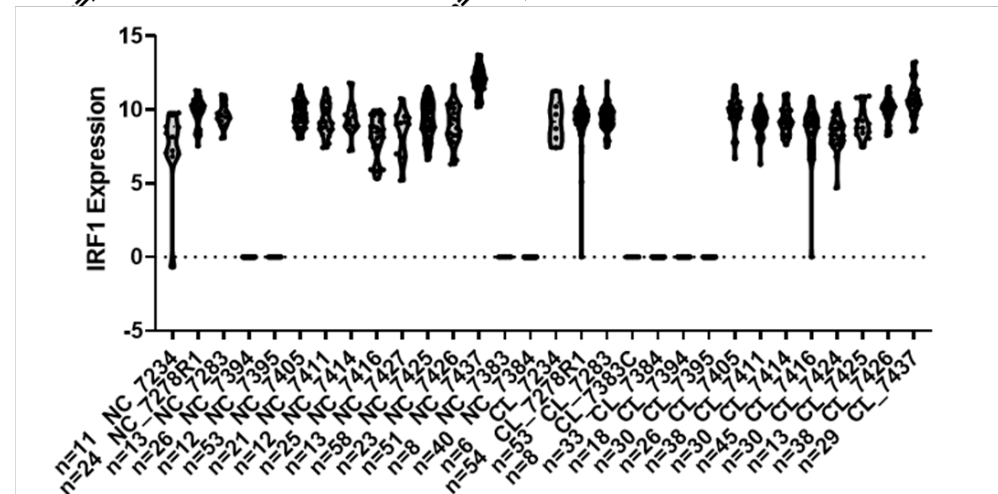

**Supplemental Figure 8. Expression of *JAK1* and *IRF1* in single classical and non-classical monocytes from patients with Systemic Lupus Erythematosus.** Left panels show cells from all patients in aggregate. Right panels show each individual patient's cells in a separate column.
