# Supplementary material for: Distinct Single Cell Gene Expression in Peripheral Blood Monocytes Correlates With Tumor Necrosis Factor Inhibitor Treatment Response Groups Defined by Type I Interferon in Rheumatoid Arthritis
Source: PubMed Central journal article supplement (PMC7378891; doi:10.3389/fimmu.2020.01384), 2020-07-16
Supplement: Image_9.pdf [file Image_9.pdf]

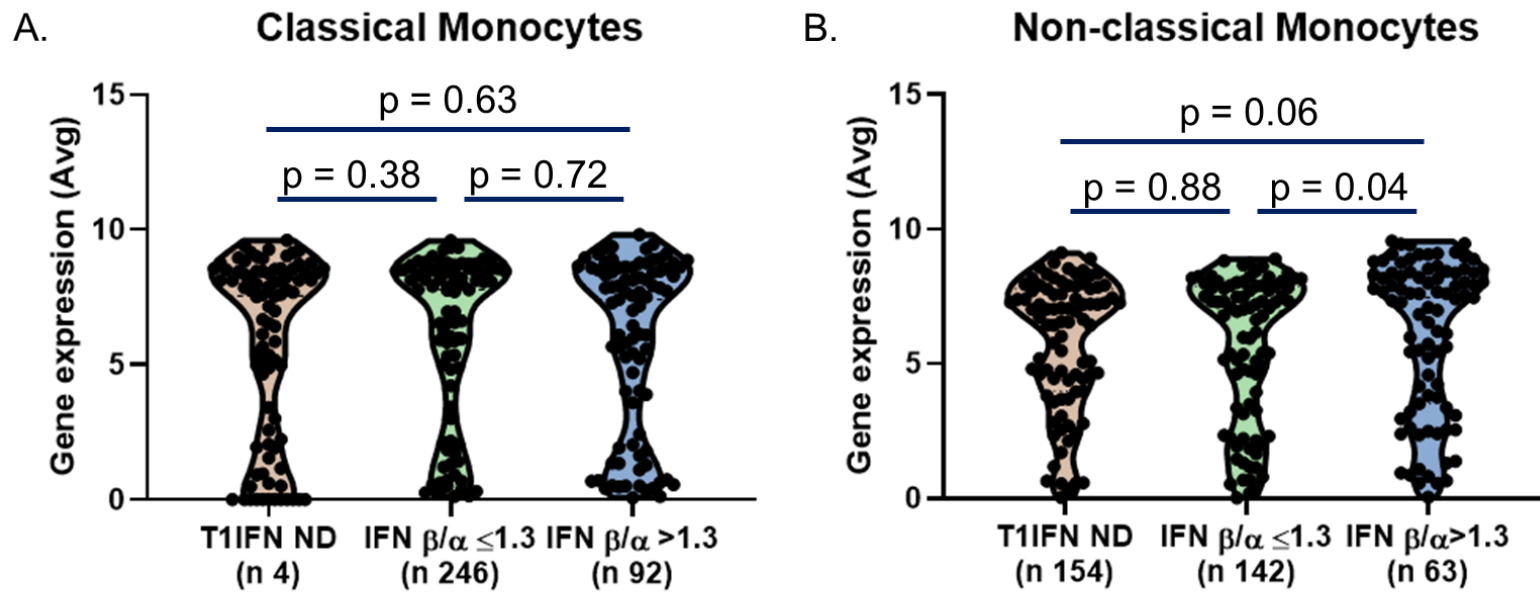

**Supplemental Figure 9. Average gene expression in single monocytes by type I IFN group.** (A). Classical monocytes. (B). Non-classical monocytes. Each dot represents a single transcript. Number of cells contributing to each group is indicated below the group name (x-axis).
