# Supplementary material for: Distinct Single Cell Gene Expression in Peripheral Blood Monocytes Correlates With Tumor Necrosis Factor Inhibitor Treatment Response Groups Defined by Type I Interferon in Rheumatoid Arthritis
Source: PubMed Central journal article supplement (PMC7378891; doi:10.3389/fimmu.2020.01384), 2020-07-16
Supplement: Image_10.pdf [file Image_10.pdf]

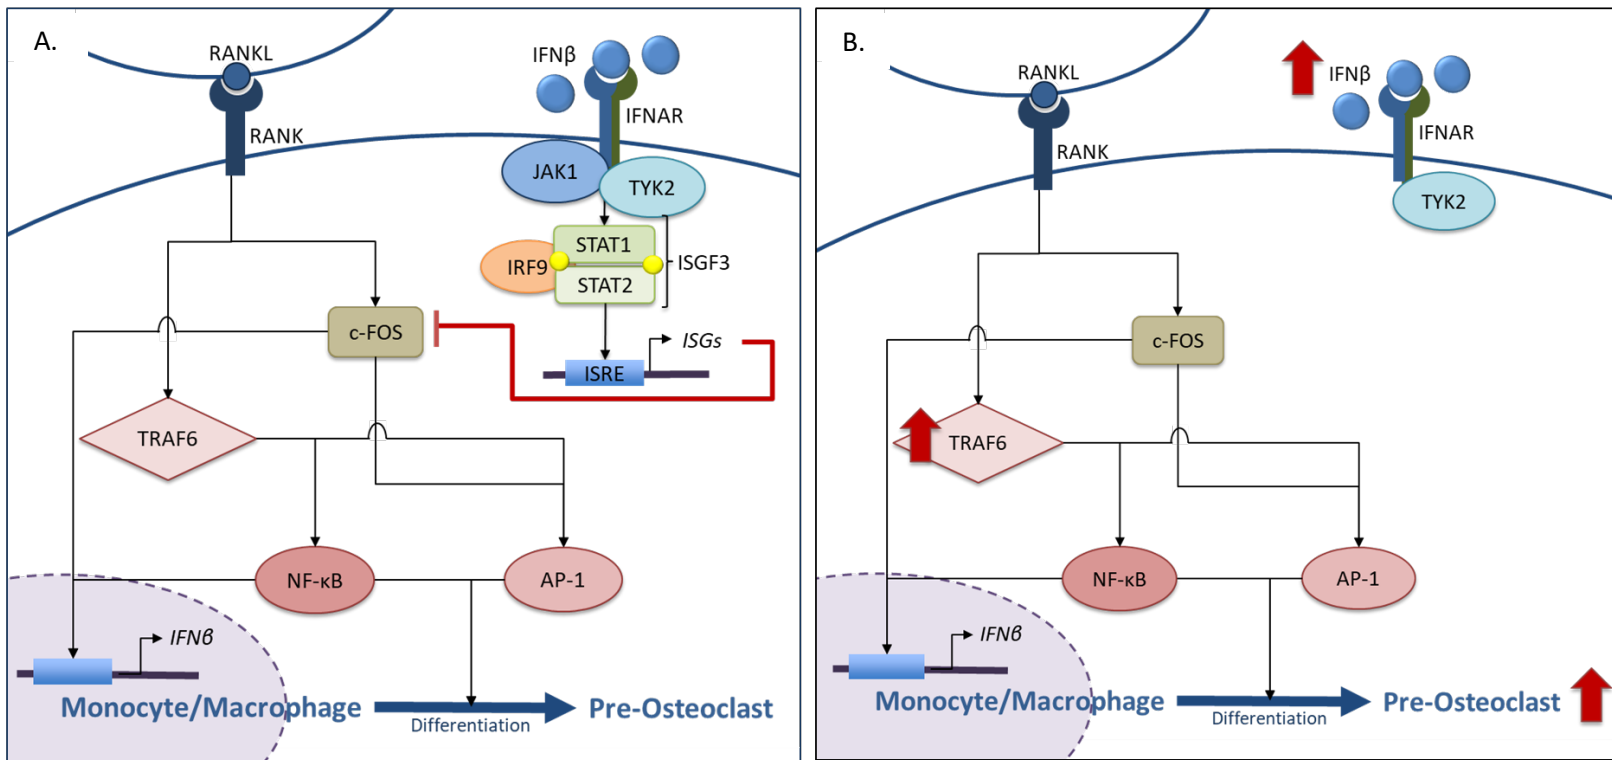

**Supplemental Figure 10. IFN $\beta$ , ISGs, and osteoclastogenesis.** IFN $\beta$  production is stimulated as a result of signaling through tumor necrosis factor receptors (TNFRs), of which RANK is an example. Interactions of RANK with RANK ligand (RANKL) activates pathways that promote production of IFN $\beta$  and osteoclastogenesis. (A). IFN $\beta$  promotes transcription of genes that inhibit osteoclastogenesis. (B). In absence of JAK1, type I IFNs cannot induce the canonical type I IFN pathway, which includes genes that inhibit osteoclastogenesis.
